# Supplementary material
Source: PubMed Central journal article supplement (PMC2679431)
Supplement: M900475200_1.pdf [file M900475200_1.pdf]

**Supplemental Table 1: PCR primers used in plasmid constructions**

---

| <b>Primer Name</b> | <b>Primer Sequence</b>                      |
|--------------------|---------------------------------------------|
| VMA13-Bam ATG      | 5'-GCGGATCCATGGGCGCAACCAAAATTTTAATGGAC-3'   |
| VMA13-stopHind     | 5'-GCAAGCTTTTATTTGAAGGTATATCCAATGATTGC-3'   |
| VMA13-Bam 352      | 5'-GCGGATCCGAATTGACCTCCTTCGATGAATAC-3'      |
| VMA13/5'2Hyb       | 5'-GCGGATCCTCATGGGCGCAACCAAAATTTTAATGGAC-3' |
| VMA13/3'2H         | 5'-CCGAGCTCGACTGATTCTGCTACCCTCTTCTG-3'      |
| VMA13/CT 5'2H      | 5'-GCGGATCCTCTTGACCTCCTTCGATGAATACGTC-3'    |
| VPH1-Bam ATG       | 5'-GCGGATCCATGGCAGAGAAGGAGGAAGCG-3'         |
| VPH1-406 Sal       | 5'-CGGTCGACTTAATTGATTTCTCTGTACTGAGCAATAC-3' |
| VPH1 5'2H          | 5'-GCGGATCCTCATGGCAGAGAAGGAGGAAGCGA-3'      |
| VPH1 3'2H          | 5'-ACCAGCATTGATTTCTCTGTACTG-3'              |
| VMA7/5'2Hyb        | 5'-GCGGATCCTCATGGCTGAGAAACGTACTCTTATAG-3'   |
| VMA7-C4            | 5'-AGCGAGGCCGTGTCACGTTC-3'                  |
| VMA8/5'2Hyb        | 5'-GCGGATCCTCATGTCTGGTAATAGAGAGCAAGTC-3'    |
| VMA8-C4            | 5'-CTGTCCATCAGATTTTAGTCACTAAC-3'            |

---
